# The American Journal of Psychiatry

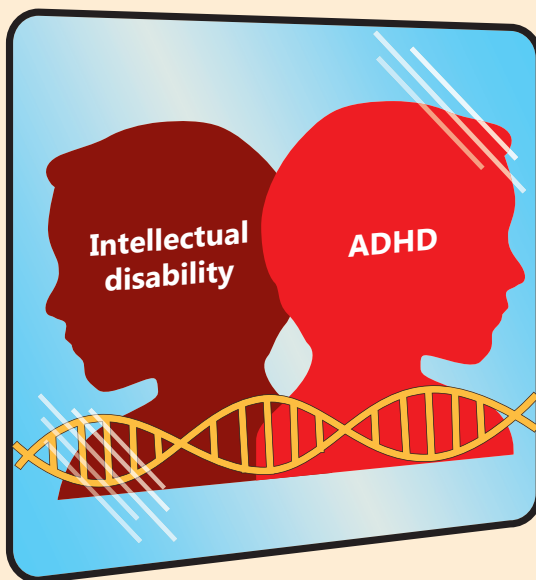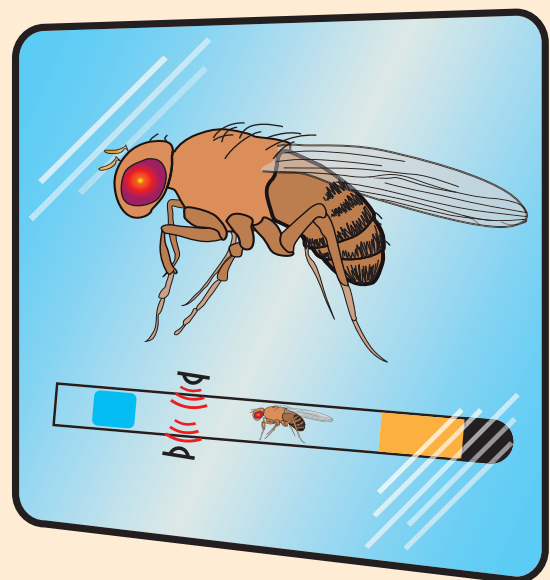

New Findings Related to Cognition, Intellectual Disability,  
Dementia, and Autism

Associations of Benzodiazepines, Z-Drugs, and Other Anxiolytics  
With Subsequent Dementia in Patients With Affective Disorders

Sleep Onset Problems and Subcortical Development in Infants  
Later Diagnosed With Autism Spectrum Disorder

Contribution of Intellectual Disability–Related Genes to  
ADHD Risk and to Locomotor Activity in *Drosophila*
