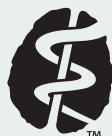

# The American Journal of Psychiatry

Official Journal of the American Psychiatric Association

## Officers 2020–2021

### President

Jeffrey L. Geller, M.D., M.P.H.

### President-Elect

Vivian B. Pender, M.D.

### Treasurer

Richard F. Summers, M.D.

### Secretary

Sandra M. DeJong, M.D., M.Sc.

### Assembly

#### Speaker

Joseph C. Napoli, M.D.

#### Speaker-Elect

Mary Jo Fitz-Gerald, M.D., M.B.A.

#### Recorder

Adam Nelson, M.D.

### Office of the CEO and Medical Director

#### CEO and Medical Director

Saul Levin, M.D., M.P.A., F.R.C.P.-E.

### Board of Trustees

Rahn Kennedy Bailey, M.D.

Jenny L. Boyer, M.D., Ph.D., J.D.

Kenneth Certa, M.D.

Anita S. Everett, M.D.

Ayana Jordan, M.D., Ph.D.

Glenn A. Martin, M.D.

Annette M. Matthews, M.D.

Michael Mensah, M.D., M.P.H.

Vivian B. Pender, M.D.

Eric M. Plakun, M.D.

Michele Reid, M.D.

Bruce J. Schwartz, M.D.

Altha J. Stewart, M.D.

Sanya Virani, M.D., M.P.H.

Cheryl D. Wills, M.D.

Melinda Young, M.D.

## Editorial Board

### Editor-in-Chief

Ned H. Kalin, M.D.

### Deputy Editors

Elisabeth Binder, M.D., Ph.D.

Kathleen T. Brady, M.D., Ph.D.

David A. Lewis, M.D.

Daniel S. Pine, M.D.

Carolyn Rodriguez, M.D., Ph.D.

Madhukar Trivedi, M.D.

### Associate Editors

Huda Akil, Ph.D.

Melissa Arbuckle, M.D., Ph.D.

Alan Brown, M.D., M.P.H.

Tyrone Cannon, Ph.D.

Karl Deisseroth, M.D., Ph.D.

Benjamin G. Druss, M.D., M.P.H.

Graham J. Emslie, M.D.

Javier I. Escobar, M.D., M.Sc.

Julie L. Fudge, M.D.

Qiyong Gong, M.D., Ph.D.

Raquel E. Gur, M.D., Ph.D.

Helena Hansen, M.D., Ph.D.

Yasmin Hurd, Ph.D.

Clinton D. Kiltz, Ph.D.

Carlos López Jaramillo, M.D., M.Sc., Ph.D.

Joan L. Luby, M.D.

Constantine G. Lyketsos, M.D., M.H.S.

John C. Markowitz, M.D.

Helen S. Mayberg, M.D., F.R.C.P.C.

Terrie E. Moffitt, Ph.D.

Rajesh Narendran, M.D.

Charles B. Nemeroff, M.D., Ph.D.

Roy Perlis, M.D.

Diego A. Pizzagalli, Ph.D.

Bryan L. Roth, M.D., Ph.D.

Alan F. Schatzberg, M.D.

Anita Thapar, M.B.B.Ch., F.R.C.Psych.,  
Ph.D., F.Med.Sci.

Mauricio Tohen, M.D., Dr.PH., M.B.A.

Giulio Tononi, M.D., Ph.D.

Nim Tottenham, Ph.D.

Eduard Vieta, M.D., Ph.D.

John T. Walkup, M.D.

### Editors Emeriti

Nancy C. Andreasen, M.D., Ph.D.

Robert Freedman, M.D.

### Former Editors

Amariah Brigham, M.D., 1844–1849

T. Romeyn Beck, M.D., 1849–1854

John P. Gray, M.D., 1854–1886

G. Alder Blumer, M.D., 1886–1894

Richard Dewey, M.D., 1894–1897

Henry M. Hurd, M.D., 1897–1904

Edward N. Brush, M.D., 1904–1931

Clarence B. Farrar, M.D., 1931–1965

Francis J. Braceland, M.D., 1965–1978

John C. Nemiah, M.D., 1978–1993

### Editorial Staff

#### Executive Editor

Michael D. Roy

#### Senior Editor

John J. Guardiano, Ph.D.

#### Production Manager

Susan Westrate

#### Staff Editors

Angela Moore

Brendan Missett

#### Online Content Manager

Michael Pogachar

#### Editorial Support Services Manager

Heidi Koch-Bubel

#### Editorial Assistant

Linda LaCour

#### Editorial Assistant/ Permissions Coordinator

Efrem Tuquabo

#### Spanish Content Manager

Sergi Casals, M.A.

### Publisher

John McDuffie
