## Subscription and Business Information

*The American Journal of Psychiatry*, ISSN 0002-953X, is published monthly by the American Psychiatric Association.

The American Psychiatric Association does not hold itself responsible for statements made in its publications by contributors or advertisers. Unless so stated, material in *The American Journal of Psychiatry* does not reflect the endorsement, official attitude, or position of the American Psychiatric Association or of the Journal's Editorial Board.

Periodicals postage paid at Washington, DC, and additional mailing offices. POSTMASTER: Send address changes to *The American Journal of Psychiatry*, Circulation Department, American Psychiatric Association, 800 Maine Avenue, S.W., Suite 900, Washington, D.C. 20024.

### Editorial Office

*American Journal of Psychiatry*  
American Psychiatric Association  
800 Maine Avenue, S.W., Suite 900  
Washington, D.C. 20024  
E-mail: [ajp@psych.org](mailto:ajp@psych.org)

### Customer Service

Phone: (800) 368-5777 (toll-free)  
E-mail: [appi@psych.org](mailto:appi@psych.org)

### APA Member Subscription Services

Phone: (888) 35-PSYCH (toll-free)

### Subscriptions

Regular and resident-fellow members in the U.S. receive print and online access as a member benefit; subscriptions for non-members start at \$348 per year. Online only subscriptions start at \$315 per year. Go to <http://www.appi.org/products> for more information.

Institutional subscriptions are tier priced. For institutional site license or pricing information, contact (202) 559-3729 or [institutions@psych.org](mailto:institutions@psych.org).

*Additional subscription options, including single issues and student rates*

Contact Customer Service

### Advertising

*Pharmaceutical Print and Online Advertising*  
Frank Cox, Kathleen Harrison, Tim Wolfinger  
Pharmaceutical Media, Inc.  
30 East 33rd Street  
New York, NY 10016  
Phone: (212) 904-0379  
E-mail: [twolfinger@pminy.com](mailto:twolfinger@pminy.com)

*Nonpharmaceutical and Online Sales*  
Eamon Wood  
Pharmaceutical Media, Inc.  
E-mail: [ewood@pminy.com](mailto:ewood@pminy.com)  
(see address and phone above).

### Permissions and Reprints

Material published in the journals of the American Psychiatric Association and American Psychiatric Association Publishing is protected by copyright and all rights are reserved. Material may not be reproduced in any form or by any means without written permission from the copyright owner. For permission to reproduce material published by APA, please visit <http://www.appi.org/customer-service/permissions> for more information. Permission can also be secured through the Copyright Clearance Center ([www.copyright.com](http://www.copyright.com)).

APA does not require that permission be obtained for the photocopying of isolated articles for nonprofit classroom or library reserve use; all fees associated with such permission are waived. This consent does not extend to other kinds of copying, such as copying for general distribution, for advertising or promotional purposes, for creating new collective works, or for resale. Requests for commercial distribution and bulk reprints should be directed to (202) 609-7075.

Indexed in Abstracts for Social Workers, Academic Abstracts, Biological Abstracts, Chemical Abstracts, Chicago Psychoanalytic Literature Index, Cumulative Index to Nursing Literature, Excerpta Medica, Hospital Literature Index, Index Medicus, International Nursing Index, Nutrition Abstracts, Psychological Abstracts, Science Citation Index, Social Science Source, and Social Sciences Index.

Pages are produced by Sheridan Journal Services (Waterbury, VT) and printed by Sheridan NH (Hanover, NH) on acid-free paper effective with Volume 169, Number 1, January 2012.

© 2020 American Psychiatric Association.

# Psychiatrists Professional Liability Insurance

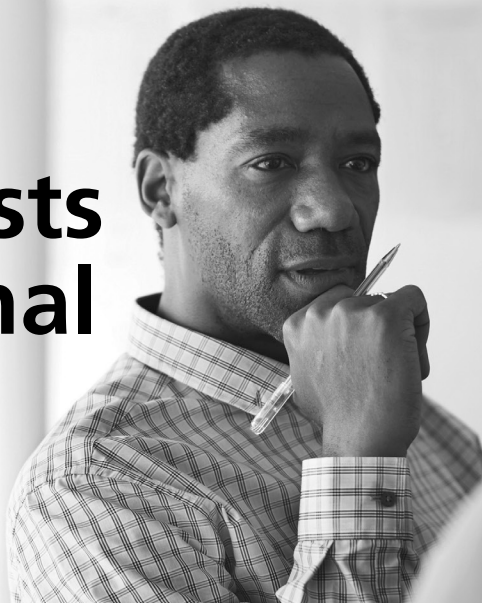

## Discounts Offered Include:

- 15% NEW POLICYHOLDER DISCOUNT\***  
(must be claims free for the last 6 months)
- Up to 50% New Doctor Discount** (for those who qualify)
- 10% Claims Free Discount** (for those practicing 10 years, after completion of training, and remain claims free)
- 50% Resident-Fellow Member Discount**
- 15% Child and Adolescent Psychiatrist Discount** (for those whose patient base is more than 50% children and adolescents)
- 50% Part-time Discount** (for up to 20 client hours a week or less)
- 5% Risk Management Discount** (for 3 hours of CME)

*\*Where allowable by law and currently not available in AK or NY.  
(Above Discounts and Coverage Features are subject to individual state approval.)*

**40**  
YEARS

For over 40 years we have provided exceptional protection and have a reputation for outstanding customer service. Our extensive years of experience and industry knowledge allows us to help you by providing worry free coverage so you can concentrate on what you do best – helping people help themselves. When it comes to caring about people, we have a lot in common.

## Our Psychiatrists Professional Liability Program Provides:

- Limits up to \$150,000 in Defense Expenses related to Licensing Board Hearings and other Proceedings
- Up to \$150,000 in Fire Legal Liability Coverage
- Up to \$100,000 in Medical Payments for Bodily Injury
- Up to \$25,000 for First Party Assault and Battery Coverage
- Up to \$25,000 for Information Privacy Coverage (HIPAA)
- Up to \$15,000 in Emergency Aid Coverage
- Insured's Consent to Settle required in the settlement of any claim – No arbitration clause
- Telepsychiatry, ECT, Forensic Psychiatry Coverage
- Risk Management Hotline with 24/7 Service for Emergencies

Visit us at [apamalpractice.com](http://apamalpractice.com) or call **877.740.1777** to learn more.

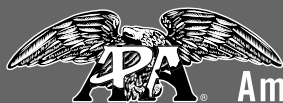

**American Professional Agency**

LEADERS IN PSYCHIATRIC MEDICAL LIABILITY INSURANCE

Endorsed by:

AMERICAN  
PSYCHIATRIC  
ASSOCIATION

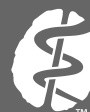

Source: https://psychiatryonline.org/doi/suppl/10.1176/ajp.2020.177.issue-6/suppl_file/back.pdf
